# Supplementary material for: Hepatic Fis1 regulates mitochondrial integrated stress response and improves metabolic homeostasis
Source: PubMed Central journal article supplement (PMC8876406; doi:10.1172/jci.insight.150041), 2022-02-22
Supplement: jciinsight-7-150041-s184.pdf [file jciinsight-7-150041-s184.pdf]

## **Supplemental Information**

Hepatic Fis1 regulates mitochondrial integrated stress response and improves metabolic homeostasis

Yae-Huei Liou, Jean Personnaz, David Jacobi, Nelson H. Knudsen, Mayer M. Chalom, Kyle A. Starost, Israel C. Nnah, and Chih-Hao Lee

## Supplemental Figures

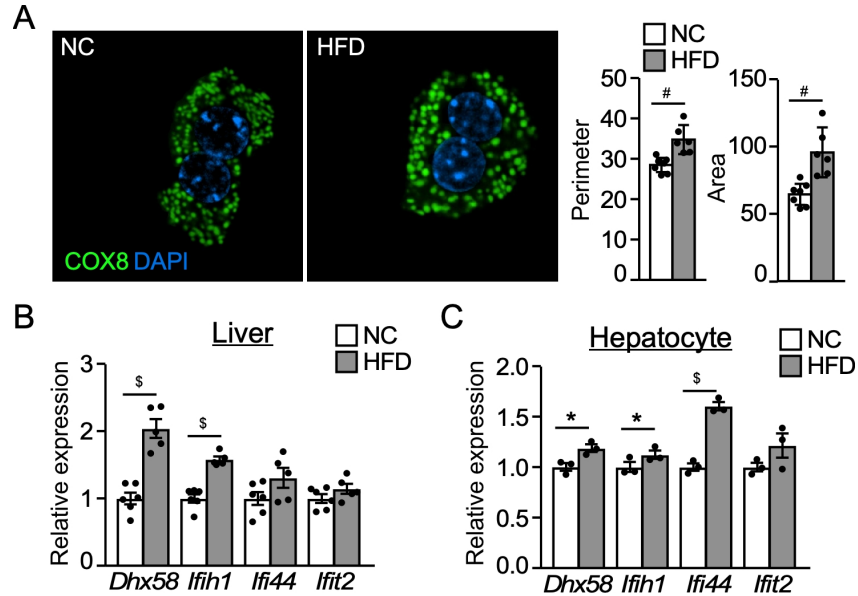

**Supplemental Figure 1. Chronic over-nutrition is associated with mitochondrial dysfunction and enhanced IFN-stimulated gene expression in mouse livers.** (A) Representative confocal images of liver cryosections (20  $\mu\text{m}$ ) from NC or HFD fed mice collected at ZT2 (8 am). C56BL/6J male mice were infected with Ad-Cox8-GFP to label mitochondria. Quantification of mitochondrial morphology was analyzed using ImageJ.  $n=6$ . (B) Relative expression of IFN-stimulated genes determined by real-time PCR in the liver and (C) in primary hepatocyte from male mice fed a NC or HFD for 8 weeks starting at 6-week old of age.  $n=5-6$ . Experiments repeated in 2 mouse cohorts. Values are presented as mean  $\pm$  SEM. Significance was determined by unpaired, two-tailed Student's  $t$  test. \* $p<0.05$ , # $p<0.01$ , \$ $p<0.001$ .

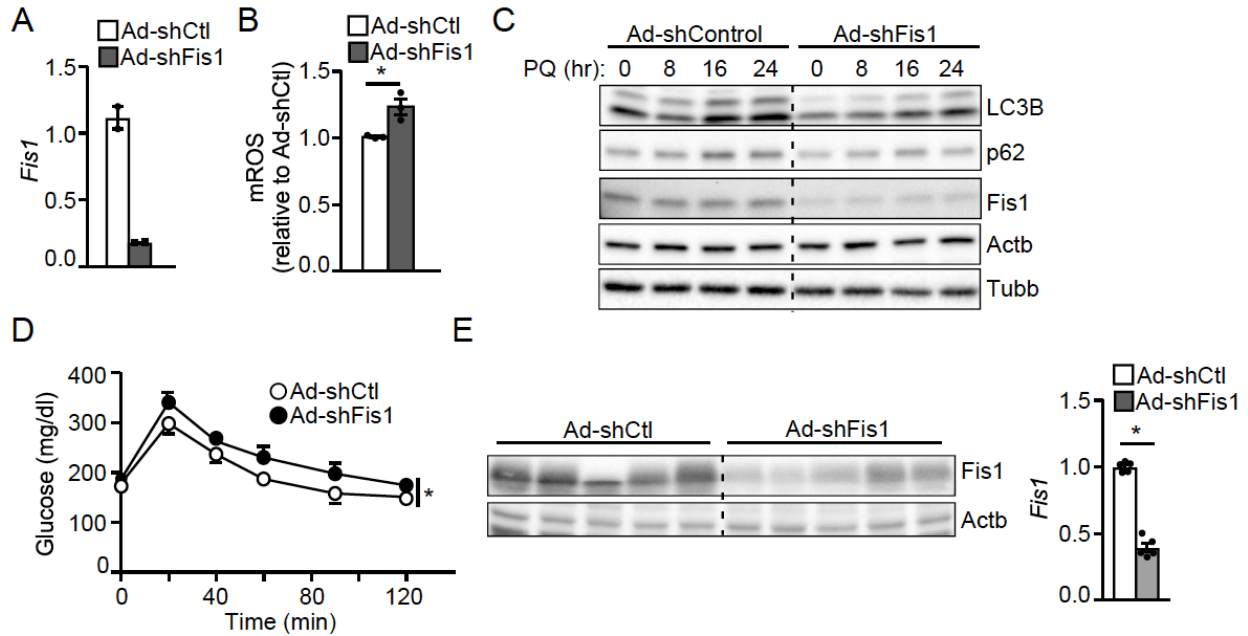

**Supplemental Figure 2. Reduced hepatic Fis1 activity worsens oxidative stress and glucose intolerance.** (A) *Fis1* gene expression by real-time PCR to assess the knockdown efficiency of Ad-shFis1 in primary hepatocytes. Ad-shCtl: scrambled shRNA control adenovirus. (B) Mitochondrial ROS (mROS) was measured 48 hours after Ad-shCtl and Ad-shFis1 infection in primary hepatocyte. mROS was determined using mean fluorescence intensity of the MitoSOX signal and presented as fold change of Ad-shFis1 vs Ad-shCtl. n=3. (C) Immunoblotting showing LC3B, p62 and Fis1 protein levels in hepatocytes infected with Ad-shCtl or Ad-shFis1 for 48 hours, followed by 0.2 mM paraquat treatment for indicated time points. Paraquat was used to trigger oxidative stress. Tubb served as a loading control. (D) Glucose tolerance test (GTT) in HFD fed (4 weeks) male mice infected with Ad-shCtl or Ad-shFis1. n=5. (E) Immunoblotting (left panel) and qPCR (right panel) showing Fis1 protein and mRNA levels in liver of HFD fed male mice infected with Ad-shCtl or Ad-shFis1. n=5. A-C: repeated 3 times and D-E: conducted in 2 separate cohorts. Values are presented as mean  $\pm$  SEM. Significance was determined by Two-way ANOVA for GTT and unpaired, two-tailed Student's *t* test for two group comparisons. \* $p$ <0.05.

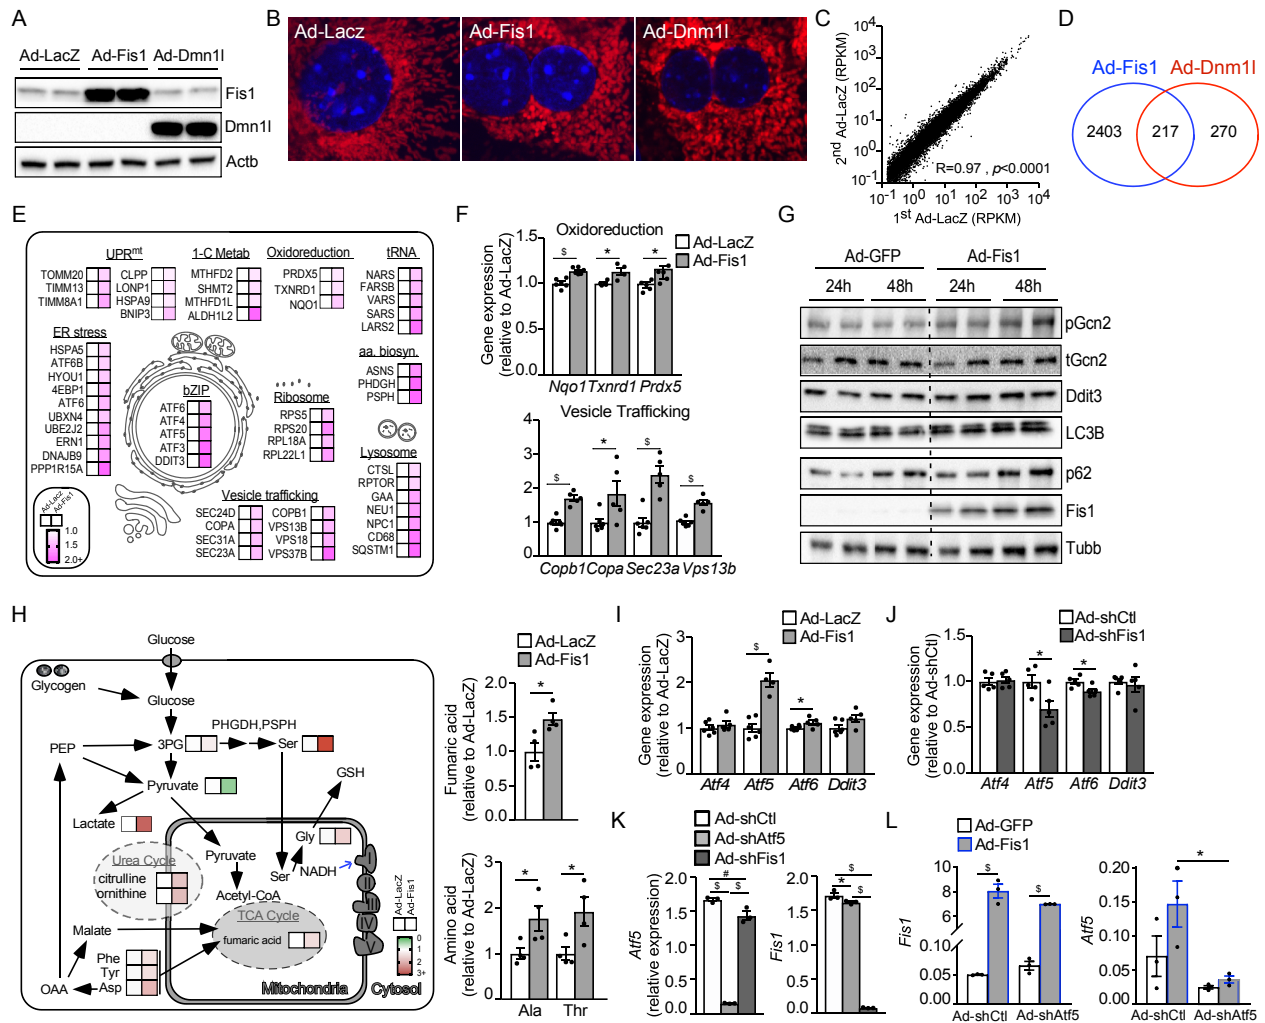

**Supplemental Figure 3. Fis1 induces integrated stress response in mouse hepatocytes.** (A) Evaluation of Fis1 and Dnm11 (Drp1) over-expression by Ad-Fis1 and Ad-Dnm11 using immunoblotting. Primary hepatocytes were infected with Ad-LacZ (control), Ad-Fis1 and Ad-Dnm11 for 48 hours. Actb protein level was used for loading control.  $n=2$ , repeated 3 times. (B) Mitochondrial morphology in LacZ (Ad-LacZ, control), Fis1 (Ad-Fis1) or Dnm11 (Ad-Dnm11) over-expressing primary hepatocytes. Hepatocytes were co-infected with Ad-Cox8-mCherry to label mitochondria and cultured in the EBSS (with 1 g/L glucose) low nutrient medium to trigger fusion (elongated mitochondrial networks). Experiments repeated 3 times. (C) RPKM dot plot analysis of gene expression in Ad-LacZ infected hepatocytes comparing two independent RNA-seq experiments to assess potential variables contributed by different adenovirus preparations. The Pearson Correlation Coefficient  $r=0.97$ ,  $p<0.001$ . (D) Venn diagram comparing genes significantly changed ( $FDR < 0.001$ ) by Ad-Fis1 or Ad-Dnm11 (vs Ad-LacZ) in hepatocytes identified by RNA-seq. (E) Heatmap showing representative genes/pathways from functional clustering of Ad-Fis1 up-regulated genes. (F) Validation of RNA-seq results for oxidoreduction and vesicle trafficking genes of Ad-Fis1 or Ad-LacZ infected hepatocytes by real-time qPCR.  $n=4-5$ . (G) Immunoblotting showing phosphorylated and total Gcn2, Ddit3, LC3B, p62 and Fis1 protein levels. Primary hepatocytes of NC fed male mice were infected with Ad-GFP or Ad-Fis1 for 24 or 48 hours.  $n=2$ , repeated twice. (H) Summary of metabolomic analysis (left panel) and the fold change of selected

metabolites (right panel) regulated by Ad-Fis1, compared to Ad-LacZ in primary hepatocytes. n=4 for one experiment. **(I)** Expression of stress responsive transcription factors in the liver of mice with hepatic *Fis1* over-expression (Ad-Fis1 vs Ad-LacZ, see mouse cohort in Figure 2A) or **(J)** in mice with hepatic *Fis1* knockdown (Ad-shFis1 vs Ad-shCtl, see mouse cohort in Supplemental Figure 2D). n=5. **(K)** Assessing the efficiency of knocking down *Atf5* or *Fis1* in primary hepatocytes (Ad-shFis1 or shAtf5 vs Ad-shCtl; data was associated with Figure 3D). n=3. **(L)** Relative expression of *Fis1* and *Atf5* by real-time PCR in hepatocytes infected with combinations of Ad-GFP/Ad-Fis1 and Ad-shCtl/Ad-shAtf5. Data was associated with Figure 3E and 4D. n=3. Values are presented as mean  $\pm$  SEM. Significance of **F**, **H**, **I** and **J** were determined by unpaired, two-tailed Student's *t* test; **K** and **L** by One-way ANOVA followed by Sidak multiple comparisons test. \* $p$ <0.05, # $p$ <0.01,  $^s p$ <0.001.

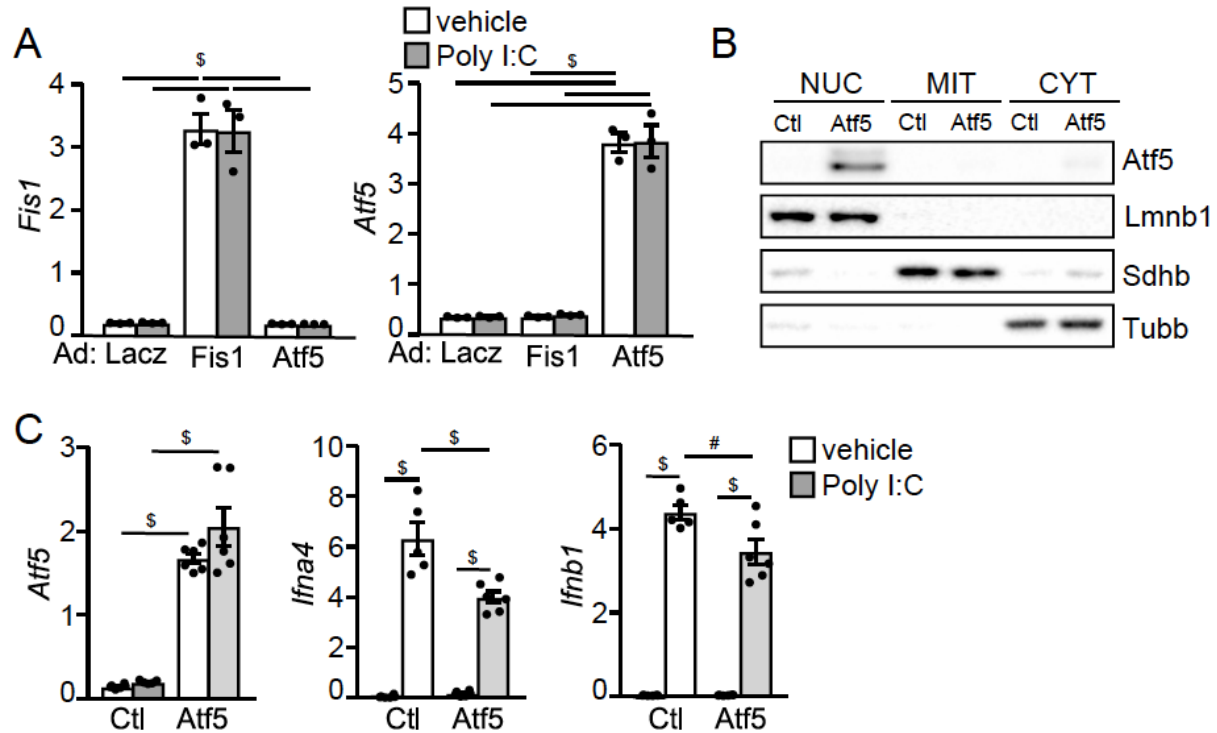

**Supplemental Figure 4. Nuclear localized Atf5 regulates IFN-I response.** (A) Assessing *Fis1* and *Atf5* genes expression in primary hepatocytes infected with Ad-LacZ, Ad-Fis1 or Ad-Atf5 with/without Poly I:C stimulation (see Figure 4E). n=3. (B) Immunoblotting showing cellular localization of Atf5 (with C-terminal HA-tag) in Hepa1-6 mouse hepatoma cells. Cell lysates from control (Ctl) and *Atf5* over-expressing Hepa1-6 stable lines were fractionated to obtain the nuclear (NUC), mitochondria (MIT) and cytosolic (CYT) fractions. An equal amount of protein was loaded. Anti-HA antibody was used to probe Atf5 protein. Lmnb1, Sdhb and Tubb were used to assess the purity of the nuclear, mitochondrial and cytosolic fraction, respectively. (C) *Atf5*, *Ifna4* and *Ifnb1* gene expression in control and *Atf5* over-expressing Hepa1-6 stable lines stimulated with/without 100 ng/well Poly I:C for 24 hours. n=5-6. Data represent 1 of the 3 repeated experiments. Values are presented as mean  $\pm$  SEM. Significance was determined by One-way ANOVA followed by Sidak multiple comparisons test. # $p$ <0.01, \$ $p$ <0.001.

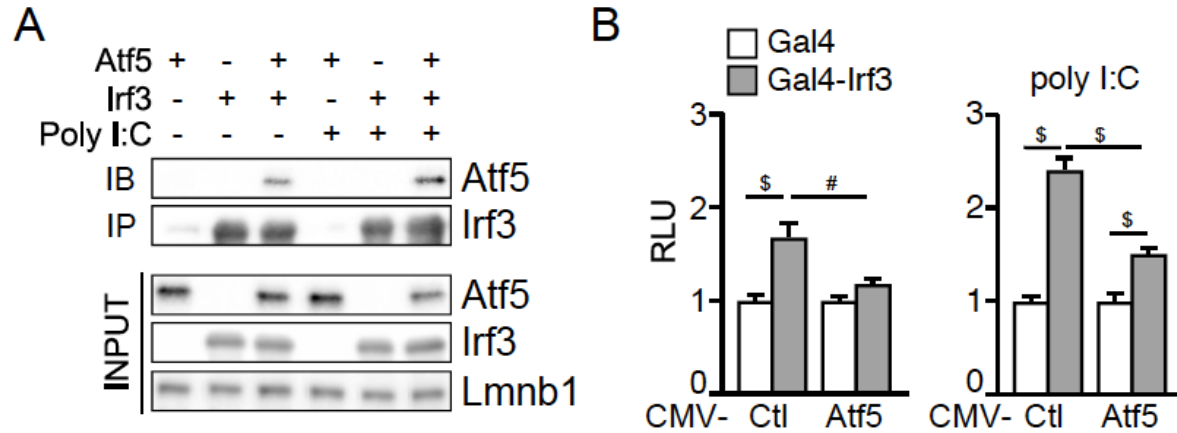

**Supplemental Figure 5. Atf5 interacts with Irf3.** (A) Immunoblotting showing co-immunoprecipitation of Atf5 with Irf3. AD293 cells were transfected with expression vectors for Atf5 (CMV-Atf5-HA), Irf3 (CMV-FLAG-Irf3) or Atf5/Irf3. Thirty-two hours later, cells were stimulated with/without 100 ng/well Poly I:C for an additional 16 hr. IP: immunoprecipitation with anti-FLAG M2 affinity gel; IB: immunoblotting with anti-HA antibody; Input: 1/20 of the cell lysate used for IP. Lmnb1 was used for loading control. (B) Atf5 suppresses the transactivation activity of Irf3. AD293 cells were co-transfected with a luciferase reporter driven by SV40 promoter with 4 copies of the Gal4-binding site and an expression vector for Gal4 control or Gal4-Irf3, together with a control (Ctl) or *Atf5* expression vector (driven by CMV promoter). CMV- $\beta$ -galactosidase was included to monitor the transfection efficiency. Cells were transfected with/without 100 ng/well Poly I:C for the last 16 hours. The luciferase activity was normalized by the  $\beta$ -galactosidase activity. Relative light unit (RLU) was presented as fold change of Gal4-Irf3 vs Gal4.  $n=5$ . Data represent 1 of the 3 repeated experiments. Values are presented as mean  $\pm$  SEM. Significance was determined by One-way ANOVA followed by Sidak multiple comparisons test. # $p<0.01$ , \$ $p<0.001$ .

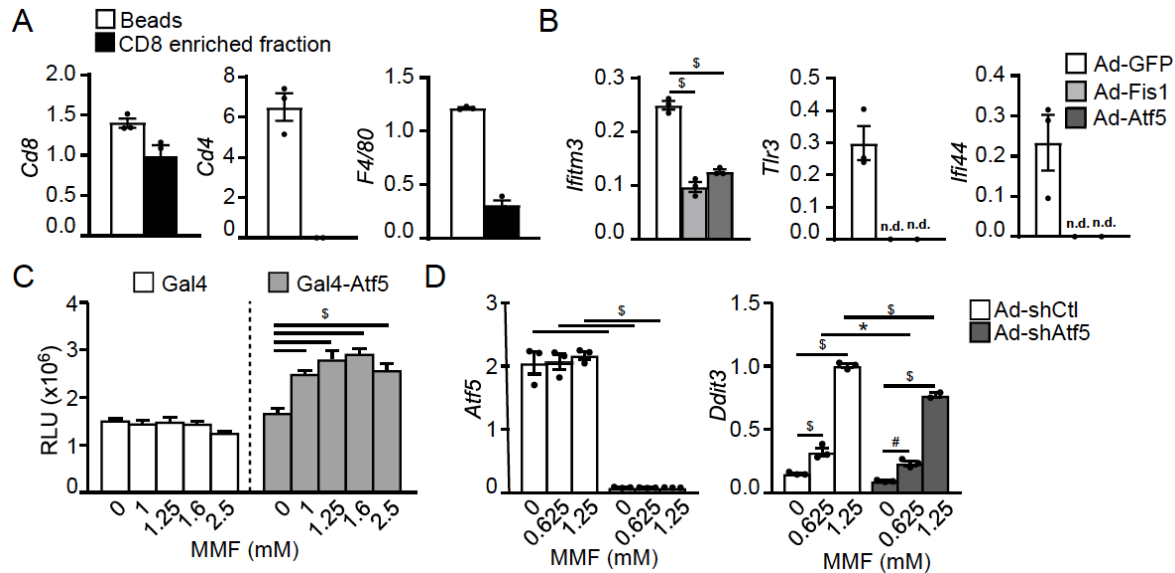

**Supplemental Figure 6. Fumarate increases ATF5 activity.** (A) Relative expression of lymphocyte (*Cd8* and *Cd4*) and macrophage (*F4/80*) markers by real-time PCR. Male mice fed a HFD for 2 months were infected with either Ad-GFP, Ad-Fis1 or Ad-Atf5. Five days after infection, livers were collected, pooled and mechanically dissociated to release hepatocytes and immune cells. CD8<sup>+</sup> cells were enriched using a negative selection method that pulled down CD8<sup>-</sup> immune cells with magnetic beads. RNA extraction was performed in both the bead and flow-through (CD8<sup>+</sup> T cell enriched) fractions to assess the purification efficiency. Experiments conducted in one mouse cohort. (B) Relative expression of genes in IFN-I signaling by real-time PCR in CD8<sup>+</sup> T cells from livers of Ad-GFP, Ad-Fis1 or Ad-Atf5 infected mice. (C) Monomethyl fumarate (MMF) increases the transactivation activity of Atf5. AD293 cells were co-transfected with a luciferase reporter driven by SV40 promoter with 4 copies of the Gal4-binding site and an expression vector for Gal4 control or Gal4-Irf3, together with CMV- $\beta$ -galactosidase to monitor the transfection efficiency. Cells were treated with MMF at the indicated doses for 16 hours. The luciferase activity was normalized by the  $\beta$ -galactosidase activity to determine relative light unit (RLU). n=5. Statistical analysis: MMF treated vs untreated condition. (D) Relative expression of *Atf5* and *Ddit3* by real-time PCR in primary hepatocyte infected with Ad-shCtl or Ad-shAtf5 treated with MMF at indicated doses for 24 hours. n=3. C-D: experiments repeated 3 times. Values are presented as mean  $\pm$  SEM. Significance of A was determined by unpaired, two-tailed Student's *t* test; B-D by One-way ANOVA followed by Sidak multiple comparisons test. \**p*<0.05, #*p*<0.01, \$*p*<0.001.



Supplemental Table 1. Fasting blood chemistry in the Ad-shFis1 vs Ad-shCtl mouse cohort

|                           | Ad-shCtl (n=5) | Ad-shFis1 (n=5) |
|---------------------------|----------------|-----------------|
| Body weight (g)           | 28.60 ± 1.22   | 28.80 ± 0.70    |
| Triglycerides (mg/dL)     | 33.12 ± 2.92   | 32.10 ± 5.82    |
| Free fatty acids (mM)     | 0.83 ± 0.07    | 0.83 ± 0.05     |
| Total cholesterol (mg/dL) | 130.90 ± 6.17  | 137.20 ± 5.31   |
| Glucose (mg/dL)           | 186.20±9.45    | 192.00±3.96     |
| Insulin (ng/mL)           | 1.37 ± 0.22    | 0.83 ± 0.19     |

C57BL/6J male mice were fed a HFD for 4 weeks starting at 6-week old of age. Data are presented as means ± SEM.

Supplemental Table 2. Fasting blood chemistry in the Ad-Fis1 vs Ad-LacZ mouse cohort

|                           | Ad-LacZ (n=7) | Ad-Fis1 (n=7)            |
|---------------------------|---------------|--------------------------|
| Body weight (g)           | 34.03 ± 1.00  | 32.83 ± 0.94             |
| Triglycerides (mg/dL)     | 78.40 ± 6.13  | 51.78 ± 9.01*            |
| Free fatty acids (mM)     | 2.37 ± 0.12   | 1.70 ± 0.14 <sup>#</sup> |
| Total cholesterol (mg/dL) | 118.80 ± 4.73 | 103.90 ± 1.95*           |
| Glucose (mg/dL)           | 128.10±5.53   | 86.67±4.20 <sup>\$</sup> |
| Insulin (ng/mL)           | n.d.          | n.d.                     |

C57BL/6J male mice were fed a HFD for 4 weeks starting at 6-week old of age. Data are presented as means ± SEM. Significance was determined by unpaired, two-tailed Student's *t* test. \**p*<0.05, <sup>#</sup>*p*<0.01, <sup>\$</sup>*p*<0.001 for Ad-Fis1 vs Ad-LacZ. n.d.: not determined.

Supplemental Table 3. Fasting blood chemistry in the Ad-Atf5 vs Ad-GFP mouse cohort

|                           | Ad-GFP (n=5)   | Ad-Atf5 (n=5)             |
|---------------------------|----------------|---------------------------|
| Body weight (g)           | 38.58 ± 2.37   | 37.02 ± 1.97              |
| Triglycerides (mg/dL)     | 44.73 ± 1.52   | 34.57 ± 1.63 <sup>#</sup> |
| Free fatty acids (mM)     | 0.64 ± 0.03    | 0.60 ± 0.04               |
| Total cholesterol (mg/dL) | 196.00 ± 17.90 | 133.10 ± 11.90*           |
| Glucose (mg/dL)           | 183.20±7.57    | 158.30±5.18*              |
| Insulin (ng/mL)           | 1.53 ± 0.31    | 0.57 ± 0.16*              |

C57BL/6J male mice were fed a HFD for 12 weeks starting at 6-week old of age. Data are presented as means ± SEM. Significance was determined by unpaired, two-tailed Student's *t* test. \**p*<0.05, <sup>#</sup>*p*<0.01 for Ad-Atf5 vs Ad-GFP.

Supplemental Table 4. Fasting blood chemistry in the monomethyl fumarate (MMF) treatment mouse cohort

|                           | Vehicle (n=5)  | MMF (n=5)     |
|---------------------------|----------------|---------------|
| Body weight (g)           | 36.52 ± 1.25   | 32.72 ± 1.94  |
| Triglycerides (mg/dL)     | 56.61 ± 16.58  | 56.22 ± 3.12  |
| Free fatty acids (mM)     | 0.72 ± 0.06    | 0.65 ± 0.01   |
| Total cholesterol (mg/dL) | 125.50 ± 11.40 | 117.00 ± 6.50 |
| Glucose (mg/dL)           | 187.00±13.48   | 133.50±8.84*  |
| Insulin (ng/mL)           | 0.55 ± 0.06    | 0.40 ± 0.08   |

C57BL/6J male mice were fed a HFD with or without MMF for 6 weeks starting at 12-week old of age. Data are presented as means ± SEM. Significance was determined by unpaired, two-tailed Student's *t* test. \**p*<0.05, MMF vs vehicle.

Supplemental Table 5. List of antibodies and reagents

| Type                   | Designation                                         | Vender                  | Catalog#   |
|------------------------|-----------------------------------------------------|-------------------------|------------|
| Antibody               | Rabbit polyclonal anti-Fis1                         | Proteintech             | 10956-1-AP |
| Antibody               | Rabbit monoclonal anti-Dmn11 (D8H5)                 | Cell Signaling          | 5391       |
| Antibody               | Rabbit monoclonal anti-Irf3 (D83B9)                 | Cell Signaling          | 4302       |
| Antibody               | Rabbit polyclonal anti-FLAG                         | Sigma-Aldrich           | F7425      |
| Antibody               | Rabbit monoclonal anti-HA (C29F4)                   | Cell Signaling          | 3724       |
| Antibody               | Rabbit polyclonal anti-LC3B                         | Sigma-Aldrich           | L7543      |
| Antibody               | Rabbit monoclonal anti-Actb (D6A8)                  | Cell Signaling          | 8457       |
| Antibody               | Rabbit monoclonal anti-Tubb (9F3)                   | Cell Signaling          | 2128       |
| Antibody               | Rabbit monoclonal anti-SQSTM1/p62 (D6M5X)           | Cell Signaling          | 23214      |
| Antibody               | GCN2 antibody                                       | Cell Signaling          | 3302       |
| Antibody               | Rabbit monoclonal Anti-Phospho-GCN2 (Thr899)(E1V9M) | Cell Signaling          | 94668      |
| Antibody               | Rabbit monoclonal anti-Lmnb1 (D9V6H)                | Cell Signaling          | 13435      |
| Antibody               | Rabbit monoclonal anti-Sdhb (EPR10880)              | Abcam                   | 175225     |
| Antibody               | Mouse monoclonal anti-CHOP (L63F7)                  | Cell Signaling          | 2895       |
| Chemical compound      | Paraquat                                            | Sigma-Aldrich           | 856177     |
| Chemical compound      | Valinomycin                                         | Sigma-Aldrich           | V0627      |
| Chemical compound      | Monomethyl fumarate                                 | Sigma-Aldrich           | 651419     |
| Chemical compound      | cOmplete™ Protease Inhibitor Cocktail               | Sigma-Aldrich           | 1187358000 |
| Chemical compound      | MitoSOX Red superoxide indicator                    | ThermoFisher Scientific | M36008     |
| Chemical compound      | MitoReacker Green                                   | ThermoFisher Scientific | M7514      |
| Chemical compound      | Seahorse XF24 FluxPak                               | Agilent                 | 102070-00  |
| Sequence based reagent | Poly I:C (HMW)                                      | Invovogene              | Tlrl-pic   |
| Recombinant protein    | Recombinant mouse IFNβ1                             | BioLegend               | 581302     |

|                         |                                                    |                         |                   |
|-------------------------|----------------------------------------------------|-------------------------|-------------------|
| Assay kit               | Infinity™ Triglycerides Liquid Stable Reagent      | ThermoFisher Scientific | TR22421           |
| Assay Kit               | Cholesterol E                                      | Fujifilm Helthcare      | 999-02601         |
| Assay Kit               | HR Series NEFA-HR(2)                               | Fujifilm Helthcare      | 999-34691         |
| Assay Kit               | Protein Carbonyl Content Assay kit                 | Abcam                   | ab126287          |
| Assay kit               | BCA Protein Assay Kit                              | Pierce                  | 23223,<br>1859078 |
| Assay kit               | Clarity Western ECL                                | BioRad                  | 170-5061          |
| Assay Kit               | Mouse/Rat Insulin Kit                              | Meso Scale Discovery    | K152BZC<br>-1     |
| Assay kit               | Bradford Reagent                                   | BioRad                  | 500-0006          |
| Recombinant DNA reagent | pBABE-puro retroviral expression vector (plasmid)  | Addgene                 | 1764              |
| Recombinant DNA reagent | IFN-Beta pGL3 (plasmid)                            | Addgene                 | 102597            |
| Liquid Medium           | Dulcecco's Modified Eagle's Medium, 1g/L glucose   | CORNING                 | 10-014-<br>CV     |
| Liquid Medium           | Dulcecco's Modified Eagle's Medium, 4.5g/L glucose | CORNING                 | 10-013-<br>CV     |
| Liquid Medium           | EBSS                                               | Gibco                   | 14155063          |
| Liquid Medium           | Williams' Medium E                                 | Gibco                   | 12551-032         |
| Cell Line               | AD293 (human embryonic kidney epithelial cells)    | Agilent                 | 240085            |
| Cell Line               | Phoenix-AMPHO (human kidney epithelial cells)      | ATCC                    | CRL-3213          |
| Cell Line               | Hepa 1-6 (mouse hepatoma cells)                    | ATCC                    | CRL-1830          |
| Mouse strain            | C57BL6/J                                           | Jackson Laboratory      | 000664            |
| Mouse diet              | Rodent diet 20                                     | PicoLab                 | 5053              |
| Mouse diet              | Mouse Diet, High Fat Fat Calories (60%)            | Bio-Serv                | F3282             |
| Adenovirus              | Ad-Atf5                                            | Vector BioLab           | #ADV-<br>253209   |
| Adenovirus              | Ad-Dmn11                                           | Vector BioLab           | #ADV-<br>257347   |
| Adenovirus              | Ad-shCtl: scrambled shRNA control                  | Vector BioLab           | #1122N            |
| Adenovirus              | Ad-shFis1                                          | Vector BioLab           | shADV-<br>259434  |
| Adenovirus              | Ad-shAtf5                                          | Vector BioLab           | shADV-<br>253209  |

|       |                                      |                         |              |
|-------|--------------------------------------|-------------------------|--------------|
| Other | Verso cDNA synthesis kit             | ThermoFisher Scientific | AB1453B      |
| Other | NucleoSpin RNA Plus kit              | Macherey-Nagel          | 740984       |
| Other | Liberase™ TM                         | Sigma-Aldrich           | 5401119001   |
| Other | Percoll                              | Sigma-Aldrich           | 17-0891-01   |
| Other | Ficoll Paque Plus                    | Sigma-Aldrich           | GE17-1440-02 |
| Other | TransIT-LT1 Transfection Reagent     | Mirus                   | MIR 2300     |
| Other | Bovine serum albumin                 | Gemini Bio-Products     | 700-107P     |
| Other | Mouse CD8T Lymphocyte Enrichment Set | BD                      | 558471       |
| Other | Anti-FLAG M2 affinity Gel            | Sigma-Aldrich           | A2220        |

Supplemental Table 6. List of primer sequences used for RT-qPCR

| Gene    | Forward Sequence         | Reverse Sequence         |
|---------|--------------------------|--------------------------|
| Hspa5   | GACTGCTGAGGCGTATTTGG     | AGCATCTTTGGTTGCTTGTCG    |
| Irf3    | TGCCTCACTCCCAGGAAAAC     | GCTTGGCAGTTGTTGAGAAGG    |
| Irf7    | CTTCCGAGAACTGGAGGAGTTT   | CTTGCCCAAACCAGGTAGA      |
| Acox2   | CACCCTGACATAGACAGTAAAAG  | CTGGGTCACGTTGGATGAGG     |
| Mff     | CAGTTGGCAGGCTAAAAAGAGA   | GCCCTACGAGTAGAAGACTGG    |
| Fis1    | AGGCTCTAAAGTATGTGCGAGG   | GGCCTTATCAATCAGGCGTTC    |
| Mfn2    | CTTCTCCTCTGTTCCAGTTG     | CATCTCGCCAGTTTATATGCAG   |
| Atf4    | GCCGGTTTAAAGTTGTGTGCT    | CTGGATTCGAGGAATGTGCT     |
| Asns    | GAGAAACTCTTCCCAGGCTTTG   | CAAGCGTTTCTTGATAGCGTTGT  |
| Atf5    | TGGGCTGGCTCGTAGACTAT     | GTCATCCAATCAGAGAAGCCG    |
| Atf6    | CGGTCCACAGACTCGTGTTT     | GCTGTGCGCCATATAAGGAAAAGG |
| Tom20   | GCCCTCTTCATCGGGTACTG     | ACCAAGCTGTATCTCTTCAAGGA  |
| Timm8a1 | CAGATGACGGAACCTTTGCTGG   | AAGACGGGTTTGGACTTCTGG    |
| Nbr1    | AGCTACCTGGAGATGTTCCGA    | AATAGGCATTGAGACTTCTGTGG  |
| Dlat    | CTTTAGCCTCCAAAGCGAGAG    | AGATTGTAAATGTTCCACCCTGG  |
| Dbt     | AGACTGACCTGTGTTTCGCTAT   | GAGTGACGTGGCTGACTGTA     |
| VPS13c  | GAAGCTAAAGTAAAAGCCACGA   | ACACATCAGAGGTGTTGACAATG  |
| Vps13b  | CAGTAAAGAGTCTCACGCTACAG  | TGTTCCAGGGATGTCACCAGA    |
| Copb1   | GCCGAGAACGTGTGCTATAC     | GCGAATGATTGTCATCAGGAGTC  |
| Copa    | ACCAAATTCGAGACGAAGAGC    | CCGATAGTCCCATAACTGGATGA  |
| Sec23a  | TCGAGTCGTCTGGAAGCTACA    | AGGTGGAAACTGATTCCTTTGG   |
| Snx5    | AGGACCGCAGCAAGTTAAGAT    | GGGCTCTGAAATGTGGACAGT    |
| Lars2   | CATAGAGAGGAATTTGCACCCTG  | GCCAGTCTGCTTCATAGAGTTT   |
| Sars    | CGGGTGGATAAAGGAGGGGA     | TGCCCCGAAATCTGCATCGTC    |
| Rpl22l1 | CCTGGAGGTTTCATTTGGACC    | ACGTAGCCAATCACGGAGATTA   |
| Rps20   | GAGAAGGTTTGTGCGGACTTG    | AAATCAATGAGTCGCTTGTGGA   |
| Ddx51   | GCTCAAGGGCTCTTTGCTTCA    | TGTGCTGATAAAGGAGCTGGAT   |
| Dhx34   | GAATTGTCCAGAGACTCGTTGT   | TGGGAGGTCTTGAGGTGCT      |
| Eer1    | TGGACGGACAGAATACACCAT    | CTGCATAGTCAAATAGGTGGCA   |
| Ube2j2  | CTTGAATGGCATTATGTTGTCCG  | CAGCCTTGTTGCACTTAAATC    |
| Dnajb9  | TCAGAGCGACAAATCAAAAAGGC  | CTATTGGCATCCGAGAGTGTTT   |
| Nars    | GAGCTGTATGTATCTGACCGAGA  | AAATGGTGGGAAATGGCTCTTT   |
| Vars    | GTCCAGCAGTGGGTCAGTTAT    | GCAGCAGTAAGGCTGTCAC      |
| Farsb   | ATGAAGAGTTTGACGAACTGTGT  | GAGGTCGTATCTGTTGGCAGG    |
| Ho1     | AAGCCGAGAATGCTGAGTTCA    | GCCGTGTAGATATGGTACAAGGA  |
| Ifitm3  | CCCCCAAACACTACGAAAGAATCA | ACCATCTTCCGATCCCTAGAC    |
| Ifit2   | AGTACAACGAGTAAGGAGTCACT  | AGGCCAGTATGTTGCACATGG    |
| Ifit1   | CTGAGATGTCACCTCACATGGAA  | GTGCATCCCCAATGGGTTCT     |
| Aox1    | GAGGAAGAATCTCCGACTCACA   | TGGTGACTGCTGTACCATGTAG   |
| Mthfd2  | AGTGCGAAATGAAGCCGTTG     | GACTGGCGGGATTGTCACC      |
| Mthfd11 | GCATGGCCTTACCCTTCAGAT    | GTACGAGCTTCCCAGATTGA     |
| Aldh1l2 | ACCAGCCGGGTTTATTTCAA     | ACTCCCACTACTCGGTGGC      |



|       |                        |                          |
|-------|------------------------|--------------------------|
| Shmt2 | TGGCAAGAGATACTACGGAGG  | GCAGGTCCAACCCCATGAT      |
| Ifit3 | ATGAGTGAGGTCAACCGGAAT  | CATTGTTGCCTTCTCCTCAGAG   |
| Ddx58 | AAGAGCCAGAGTGTCAGAATCT | AGCTCCAGTTGGTAATTTCTTGG  |
| Dhx58 | CAACACCATCTTGAGCCGTA   | AATTCGCACAAAGCTGTAGGA    |
| Zbp1  | TCAGGAAGGCCAAGACATAGCT | TCTGGATGGCGTTTGAATTGG    |
| Usp18 | TTGGGCTCCTGAGGAAACC    | CGATGTTGTGTAACCAACCAGA   |
| Ifnb1 | CAGCTCCAAGAAAGGACGAAC  | GGCAGTGTAACTCTTCTGCAT    |
| Ifna4 | TGATGAGCTACTACTGGTCAGC | GATCTCTTAGCACAAGGATGGC   |
| Tlr3  | CCTCCAAGTGTCTACCAGTTCC | GCCTGGCATAGTTATTGTGC     |
| Cd4   | TGCCCCACCGGATGCAGAA    | CAGGTGGTGGGCTGCAGGTG     |
| Cd8   | TGCAAATGTCCAGGCCGCT    | TGTAGCTTCCTGGCGGTGCC     |
| F4/80 | CTTTGGCTATGGGCTTCCAGTC | GCAAGGAGGACAGAGTTTATCGTG |
| Ifi44 | CCTGGTTCAGCAAACACGAGT  | TGGCCTTGATGGAATATGTCCT   |
| 36b4  | AGATGCAGCAGATCCGCAT    | GTTCTTGCCCATCAGCACC      |

Supplemental Table 7. Description of animal cohorts

| Cohort info                                         | Cohorts/<br>repeats* | Age         | Gender | Animal  | Figures                    |
|-----------------------------------------------------|----------------------|-------------|--------|---------|----------------------------|
| NC & 8W-HFD<br>ZT2 & ZT14                           | 2                    | 14-week-old | Male   | 4/group | 1B-1D, S1A                 |
| NC & 12W-HFD                                        | 2                    | 18-week-old | Male   | 5/group | S1B, S1C                   |
| 24 hours fasted or 19<br>hours fasted/5 hours refed | 2                    | 8-week-old  | Male   | 3/group | 1A                         |
| 4W-HFD<br>Ad-Lacz or Ad-Fis1<br>infected            | 2                    | 9-week-old  | Male   | 7/group | 2A-2E, S3H                 |
| 12W-HFD<br>Ad-GFP or Ad-Fis1<br>infected            | 1                    | 18-week-old | Male   | 6/group | 2F-2H, 4C                  |
| 4W-HFD<br>Ad-shCtl or Ad-shFis1<br>infected         | 2                    | 9-week-old  | Male   | 5/group | S2A, S2B, S2D,<br>S2E, S3I |
| 11W-HFD<br>Ad-GFP or Ad-Atf5<br>infected            | 2                    | 17-week-old | Male   | 6/group | 6A-6E                      |
| 8W-HFD<br>Ad-GFP or Ad-Fis1 or<br>Ad-Atf5 infected  | 2                    | 15-week-old | Male   | 2/group | S6A, S6B                   |
| 6-week-HFD, 45mg MMF<br>per Kg body weight          | 2                    | 18-week-old | Male   | 5/group | 6F                         |

\*For experiments performed in two cohorts, data from one of the two were presented. Similar results were observed between two experiments. NC: normal chow; HFD: high fat diet.

**Supplemental Dataset 1 (separated file).** List of differentially expressed genes (FDR<0.001) identified by RNA-seq comparing Ad-Fis1 vs Ad-LacZ infected primary hepatocytes.

**Supplemental Dataset 2 (separated file).** List of differentially accumulated metabolites ( $p<0.05$ ) comparing Ad-Fis1 vs Ad-LacZ infected primary hepatocytes.

**Supplemental Dataset 3 (separate file).** List of transcription factors identified by Homer analysis of up- or down-regulated genes (Ad-Fis1 vs Ad-LacZ) identified by RNA-seq.
